# Supplementary material
Source: publisher figshare collection journal article supplement (https://acs.figshare.com/ndownloader/files/24109477)
Supplement: Supplementary file 1 [file 24109477]

## Supporting Information

### Multiregion Janus-Featured Cobalt Phosphide/Cobalt Composite for Highly Reversible Room-Temperature Sodium-Sulfur Batteries

Zichao Yan,<sup>†</sup> Yaru Liang,<sup>‡</sup> Weibo Hua,<sup>§</sup> Xianguang Zhang,<sup>⊥</sup> Weihong Lai,<sup>†</sup> Zhe Hu,<sup>†</sup> Wanlin Wang,<sup>†</sup> Jian Peng,<sup>†</sup> Sylvio Indris,<sup>§</sup> Yunxiao Wang,<sup>\*,†</sup> Shu-Lei Chou,<sup>\*,†</sup> Huakun Liu,<sup>†</sup> and Shi-Xue Dou<sup>†</sup>

<sup>†</sup>Institute for Superconducting & Electronic Materials, University of Wollongong, Innovation Campus, Squires Way, North Wollongong, New South Wales 2500, Australia.

<sup>‡</sup>Powder Metallurgy Research Institute State Key Laboratory of Powder Metallurgy, Central South University, Lushan South Road, Changsha, 410083, P. R. China

<sup>§</sup>Institute for Applied Materials (IAM), Karlsruhe Institute of Technology (KIT), Eggenstein-Leopoldshafen 76344, Germany

<sup>⊥</sup>Collaborative Innovation Center of Henan Province for Green Manufacturing of Fine Chemicals, Key Laboratory of Green Chemical Media and Reactions, School of Chemistry and Chemical Engineering, Henan Normal University, Henan, 453007, P. R. China

Corresponding Author: \* [yunxiao@uow.edu.au](mailto:yunxiao@uow.edu.au); [shulei@uow.edu.au](mailto:shulei@uow.edu.au)

## Supplementary Figures

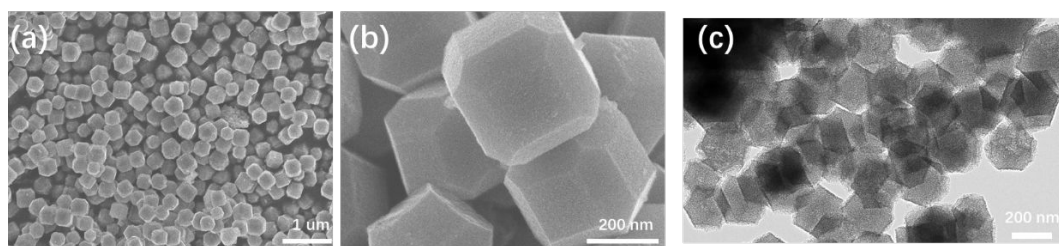

**Figure S1.** (a) SEM, (b) magnified SEM, and (c) TEM images of pure ZIF8.

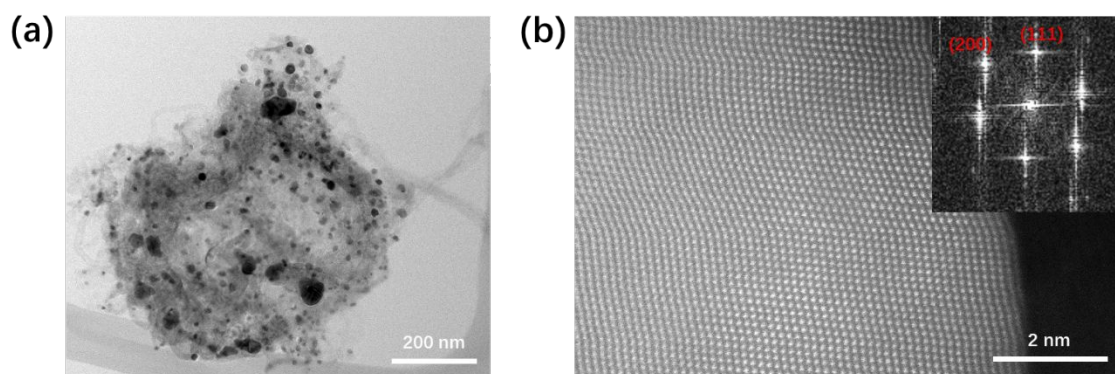

**Figure S2.** (a) STEM and (b) HAADF-STEM images of the Co/NCNHC composite. Inset in (b): FFT of the selected area.

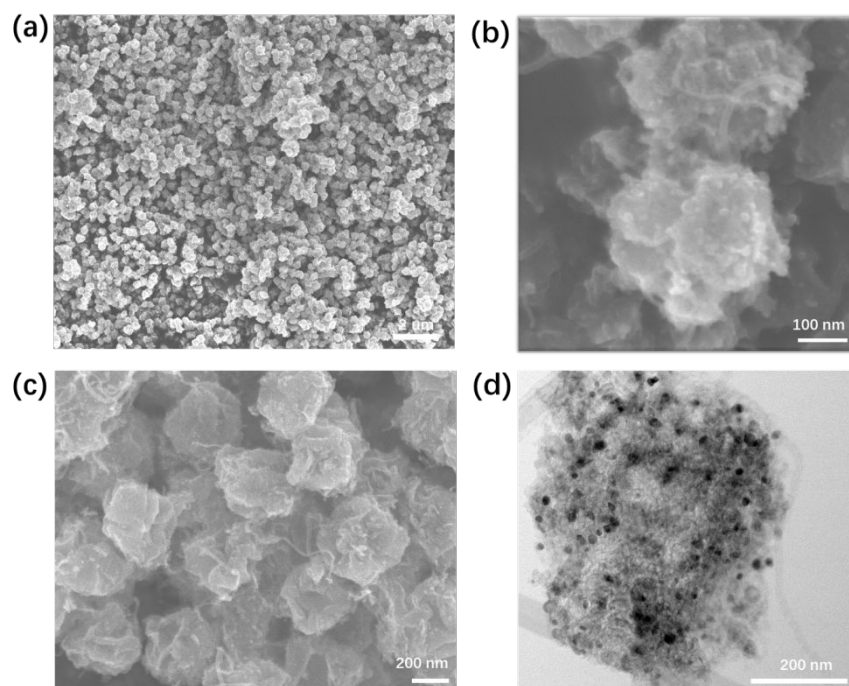

**Figure S3.** (a and b) SEM images of  $\text{Co}_3\text{O}_4\text{-Co/NCNHC}$ . (c) SEM and (d) STEM images of the  $\text{CoP-Co/NCNHC}$  composite.

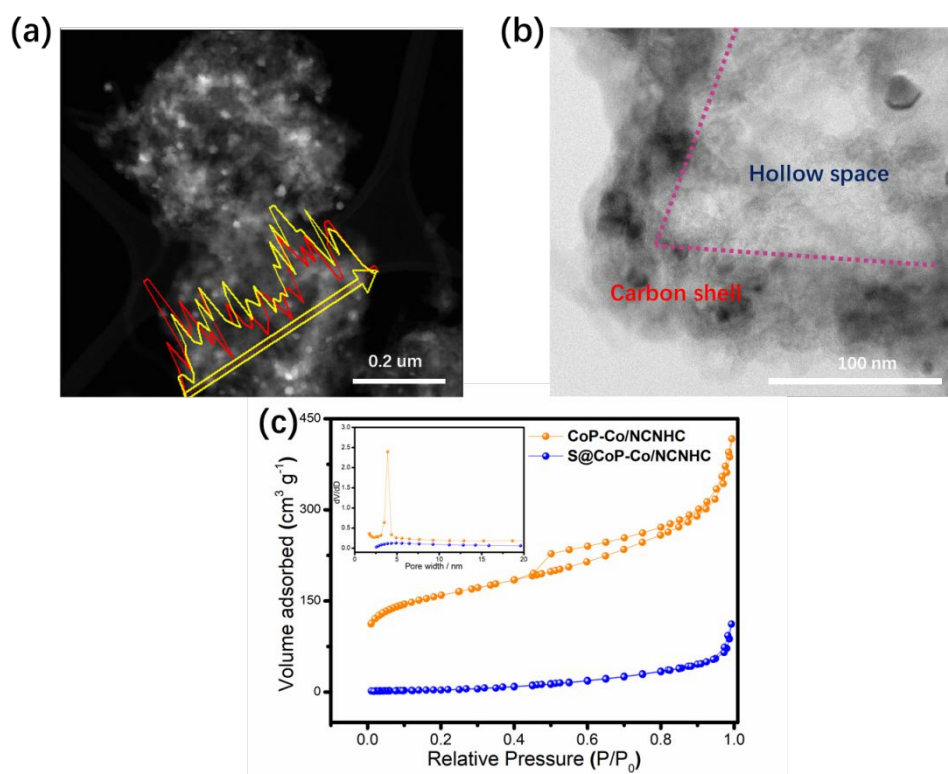

**Figure S4.** (a) Line scanning EDS spectra of S@CoP-Co/NCNHC composite (red and yellow lines refer to sulfur and carbon, respectively). (b) Enlarged STEM image of S@CoP-Co/NCNHC composite. (c) N<sub>2</sub> absorption/desorption isotherms and pore size distribution (inset) for the CoP-Co/NCNHC matrix and S@CoP-Co/NCNHC composite.

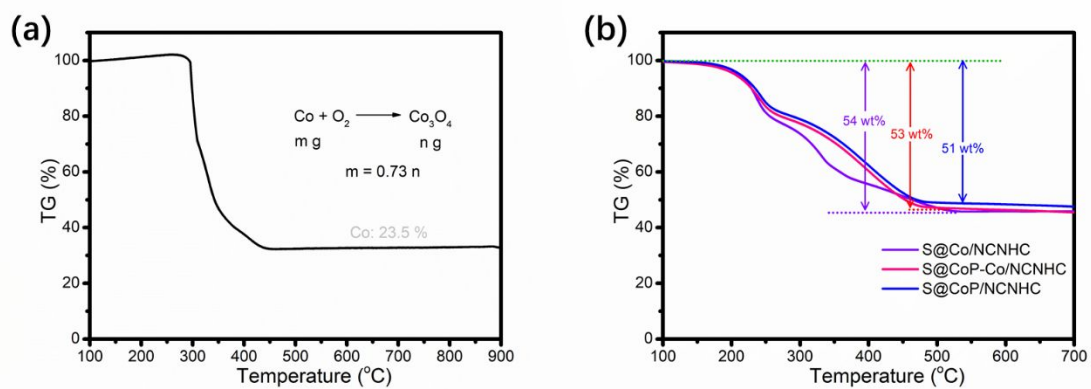

**Figure S5.** Thermogravimetry (TG) curves of (a) the Co/NCNHC in air at a heating rate of  $5^\circ\text{C min}^{-1}$  and (b) the S@CoP-Co/NCNHC, S@Co/NCNHC, and S@CoP/NCNHC in Ar at a heating rate of  $5^\circ\text{C min}^{-1}$ .

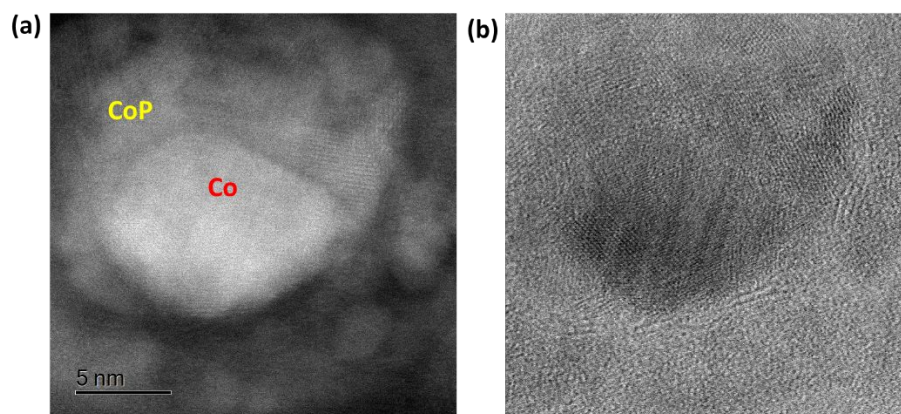

**Figure S6.** (a) HAADF- and (b)ABF-STEM images of an individual multiregion Janus-featured CoP-Co composite of the S@CoP-Co/NCNHC composite.

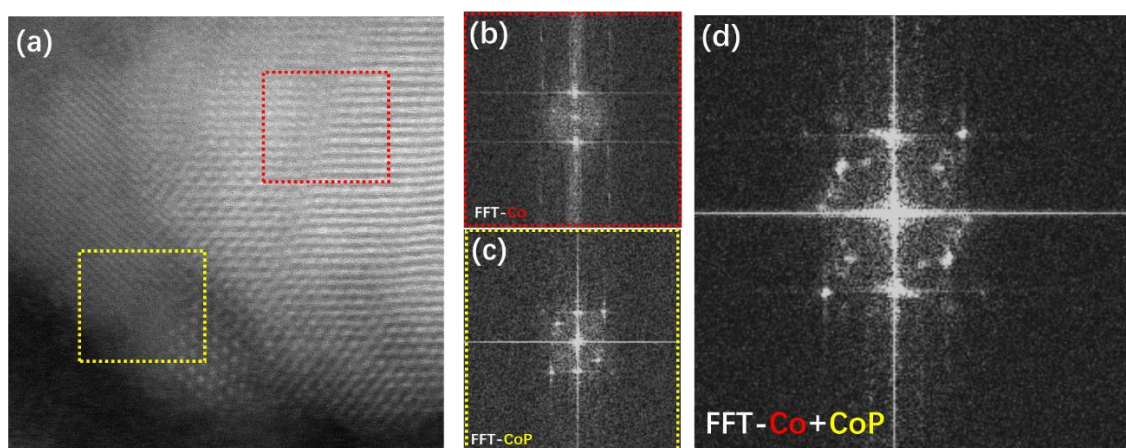

**Figure S7.** (a) HAADF-STEM image of the CoP-Co heterostructure. Corresponding FFT patterns of (b) Co, (c) CoP, and (d) Co+CoP

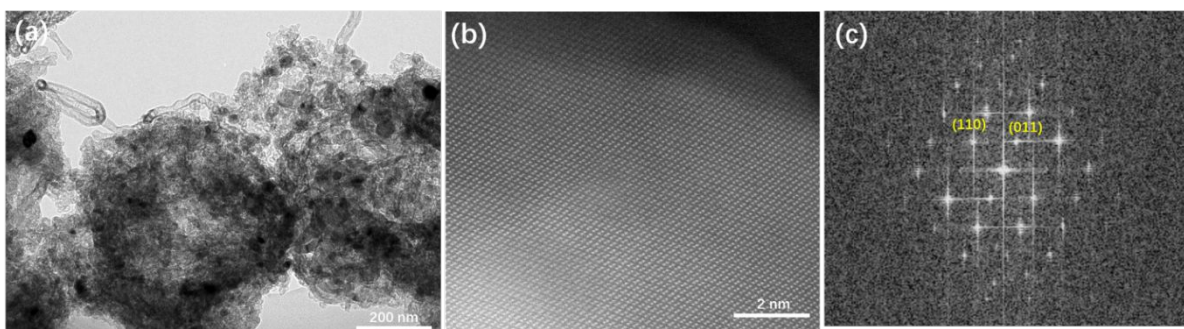

**Figure S8.** (a) STEM and (b) HAADF-STEM images, and (c) FFT pattern of the S@CoP/NCNHC composite.

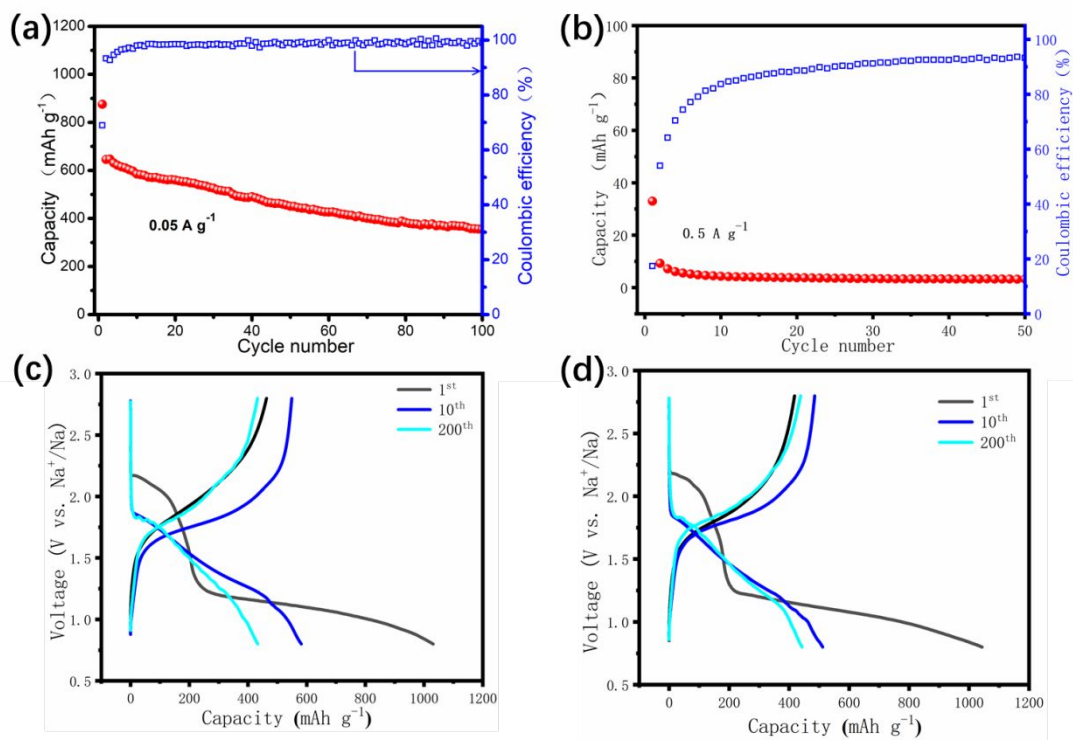

**Figure S9.** Cycling performance of (a) S@NCNHC at 0.05 A g<sup>-1</sup> and (b) CoP-Co/NCNHC. Charge/discharge curves of (c) S@Co/NCNHC and (d) S@CoP/NCNHC at 0.1 A g<sup>-1</sup>.

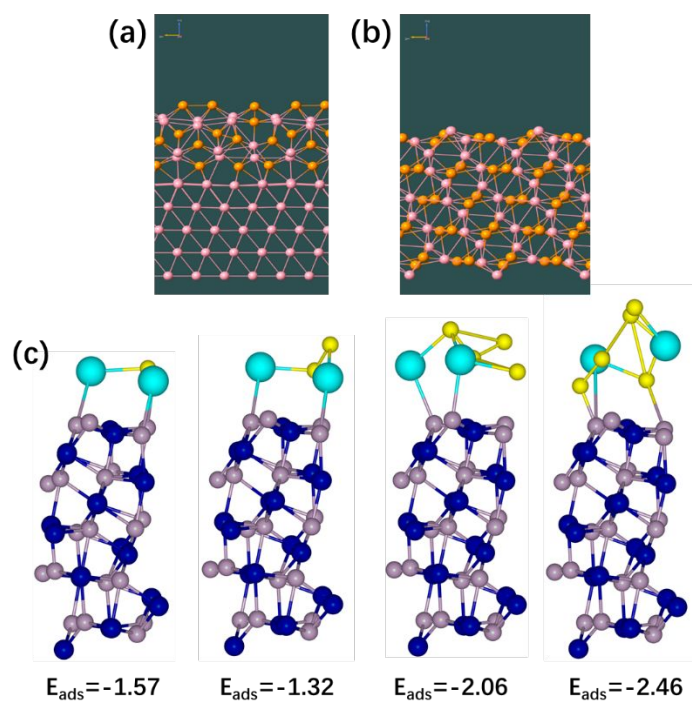

**Figure S10.** Optimized adsorption configurations of (a) CoP-Co and (b) CoP surface. (c) Atomic conformations of Na<sub>2</sub>S<sub>x</sub> species adsorbing on CoP surface with corresponding adsorption energy.

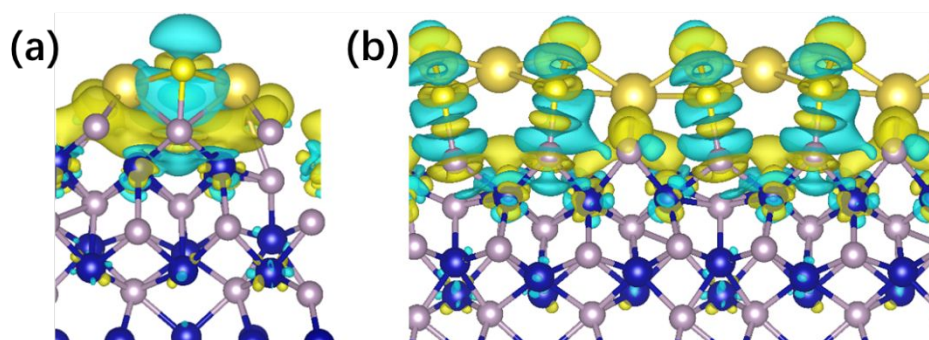

**Figure S11.** Charge density difference of (a)  $\text{Na}_2\text{S}$  and (b)  $\text{Na}_2\text{S}_4$  adsorbing on CoP-Co surface as defined by:  $\Delta\rho = \Delta\rho_{\text{CoP-Co-Na}_2\text{S}_x} - \Delta\rho_{\text{CoP-Co}} - \Delta\rho_{\text{Na}_2\text{S}_x}$ . The yellow and green area represents accumulation and depletion, respectively.

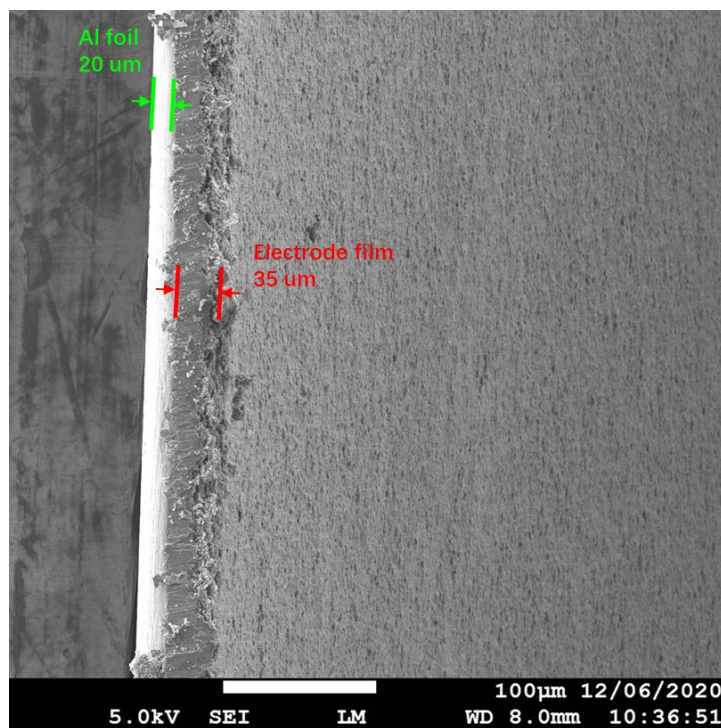

**Figure S12.** FESEM image of the cross-section for S@CoP-Co/NCNHC electrode.

## Supplementary Tables

**Table S1** | Comparison with previous room-temperature Na-S batteries in electrochemical properties

| Active material        | Loadin g sulfur | Electrolyte                                                 | Current collector | Working current       | Cycle number | Retained discharge capacity | Ref       |
|------------------------|-----------------|-------------------------------------------------------------|-------------------|-----------------------|--------------|-----------------------------|-----------|
| S@CoP-Co/NCNH C        | 53%             | 1M NaClO <sub>4</sub> in EC:PC with 3%FEC                   | Al foil           | 1A g <sup>-1</sup>    | 700          | 448mAh g <sup>-1</sup>      | This work |
| S@C                    | 35%             | 1M NaPF <sub>6</sub> with 0.25M NaNO <sub>3</sub> in TEGDME | SS discs          | 1.6A g <sup>-1</sup>  | 1500         | 300mAh g <sup>-1</sup>      |           |
| c-PANS                 | 31%             | 0.8M NaClO <sub>4</sub> in EC:DEC                           | Al foil           | 0.22A g <sup>-1</sup> | 500          | 180mAh g <sup>-1</sup>      | 9         |
| TeS@pPAN               | 47.7%           | 1M NaClO <sub>4</sub> in EC:DEC with 10%FEC                 | Al foil           | 0.5A g <sup>-1</sup>  | 600          | 970mAh g <sup>-1</sup>      | 13        |
| S/Ni-MOF-2D            | 48.6%           | 1M NaClO <sub>4</sub> in EC:PC with 5%FEC                   | Al foil           | 1.6A g <sup>-1</sup>  | 1000         | 374mAh g <sup>-1</sup>      | 19        |
| rGO/VO <sub>2</sub> /S | 40%             | 1M NaClO <sub>4</sub> in TEGDME                             | Al foil           | 0.32A g <sup>-1</sup> | 600          | 300mAh g <sup>-1</sup>      | 21        |
| SeS@pPAN               | 44.6%           | 1M NaTFSI in TEGDME with 5%FEC                              | Al foil           | 0.4A g <sup>-1</sup>  | 200          | 600mAh g <sup>-1</sup>      | 42        |
| S@CNT/NPC              | 35%             | 1M NaClO <sub>4</sub> in EC:DEC                             | Al foil           | 0.8A g <sup>-1</sup>  | 500          | 410mAh g <sup>-1</sup>      | 45        |
| S@HCS/MoS <sub>2</sub> | 44%             | 1M NaClO <sub>4</sub> in TEGDME                             | Al foil           | 1.6A g <sup>-1</sup>  | 1000         | 220mAh g <sup>-1</sup>      | 46        |
| S/(CNT@MPC             | 40%             | 1M NaClO <sub>4</sub> in EC:PC                              | Al foil           | 0.16A g <sup>-1</sup> | 20           | 1000mAh g <sup>-1</sup>     | 6         |
